# Supplementary material
Source: PubMed Central journal article supplement (PMC7156927)
Supplement: djz127_supplementary_data.pdf [file djz127_supplementary_data.pdf]

## Supplementary Materials

---

### Overdiagnosis and lives saved due to reflex testing men with intermediate prostate-specific antigen levels

Gulati R, Morgan TM, A'mar T, Psutka SP, Tosoian JJ, Etzioni R

#### SUPPLEMENTARY TABLES

**Supplementary Table 1. Performance of prostate-specific antigen (PSA) and urinary reflex biomarkers for predicting any and high-grade prostate cancer (PCa) in empirical and simulated records of men with PSA between 4.0 and 10.0 ng/mL**

| Source    | Biomarker | Any PCa |                 | High-grade PCa |                 |
|-----------|-----------|---------|-----------------|----------------|-----------------|
|           |           | AUC     | <i>p</i> value* | AUC            | <i>p</i> value* |
| Empirical | PSA       | 0.513   | ref.            | 0.564          | ref.            |
|           | T2:ERG    | 0.660   | <0.001          | 0.639          | 0.01            |
|           | PCA3      | 0.716   | <0.001          | 0.710          | <0.001          |
|           | MiPS      | 0.739   | <0.001          | 0.733          | <0.001          |
|           | MiPShg    | 0.737   | <0.001          | 0.736          | <0.001          |
| Model     | PSA       | 0.540   | ref.            | 0.541          | ref.            |
|           | T2:ERG    | 0.660   | <0.001          | 0.638          | <0.001          |
|           | PCA3      | 0.699   | <0.001          | 0.690          | <0.001          |
|           | MiPS      | 0.725   | <0.001          | 0.723          | <0.001          |
|           | MiPShg    | 0.723   | <0.001          | 0.728          | <0.001          |

\* DeLong's test to compare AUCs. *p* values are two-sided.

T2:ERG=TMPRSS2:ERG gene fusion; PCA3=prostate cancer antigen 3; MiPS=Michigan Prostate Score for any PCa; MiPShg=Michigan Prostate Score for high-grade PCa; AUC=area under the receiver operating characteristic curve

**Supplementary Table 2. Predicted immediate and long-term prostate cancer (PCa) outcomes per 1000 men with prostate-specific antigen (PSA) between 4.0 and 10.0 ng/mL at screening age 55 with possible continued biennial screening up to age 69 by biopsy strategy\***

| Biopsy strategy | Biopsies Done, n | Biopsies, %Δ† | PCa diagnoses, n |            | Overdiagnoses n | Overdiagnoses %Δ† | Deaths, n |       | Lives saved, n | Lives saved, %Δ† | Overdiagnoses per life saved |
|-----------------|------------------|---------------|------------------|------------|-----------------|-------------------|-----------|-------|----------------|------------------|------------------------------|
|                 |                  |               | Low grade        | High grade |                 |                   | PCa       | Other |                |                  |                              |
| No patients     | 887              | 11.3          | 210              | 154        | 60              | 24.1              | 43        | 957   | 44             | 20.8             | 1.3                          |
| T2:ERG >5       | 971              | 2.9           | 240              | 168        | 74              | 5.0               | 34        | 966   | 53             | 5.9              | 1.4                          |
| PCA3 >35        | 943              | 5.7           | 231              | 165        | 71              | 10.0              | 37        | 963   | 50             | 11.2             | 1.4                          |
| MiPS >30%       | 979              | 2.1           | 243              | 171        | 76              | 2.5               | 33        | 967   | 54             | 3.7              | 1.4                          |
| MiPShg >10%     | 989              | 1.1           | 244              | 172        | 77              | 1.6               | 32        | 968   | 54             | 2.9              | 1.4                          |
| IDEAL           | 947              | 5.3           | 248              | 173        | 78              | 0.1               | 32        | 968   | 56             | 0.0              | 1.4                          |
| IDEALhg         | 907              | 9.3           | 209              | 173        | 66              | 16.2              | 38        | 962   | 50             | 10.8             | 1.3                          |
| All patients    | 1000             | 0.0           | 248              | 173        | 78              | 0.0               | 32        | 968   | 56             | 0.0              | 1.4                          |

\* In contrast with Table 3, outcomes in this table are for the initial biopsy decision and any subsequent screening tests/biopsy decisions.

‘Biopsies done’ is the number of men who received at least one biopsy. T2:ERG=TMPRSS2:ERG gene fusion; PCA3=prostate cancer antigen 3;

MiPS=Michigan Prostate Score for any PCa; MiPShg=Michigan Prostate Score for high-grade PCa; IDEAL=ideal biomarker with 100%

sensitivity/specificity for any PCa; IDEALhg=ideal biomarker with 100% sensitivity/specificity for high-grade PCa

† ‘%Δ’ shows the percent reduction under each biopsy strategy relative to biopsying all patients.

SUPPLEMENTARY FIGURES

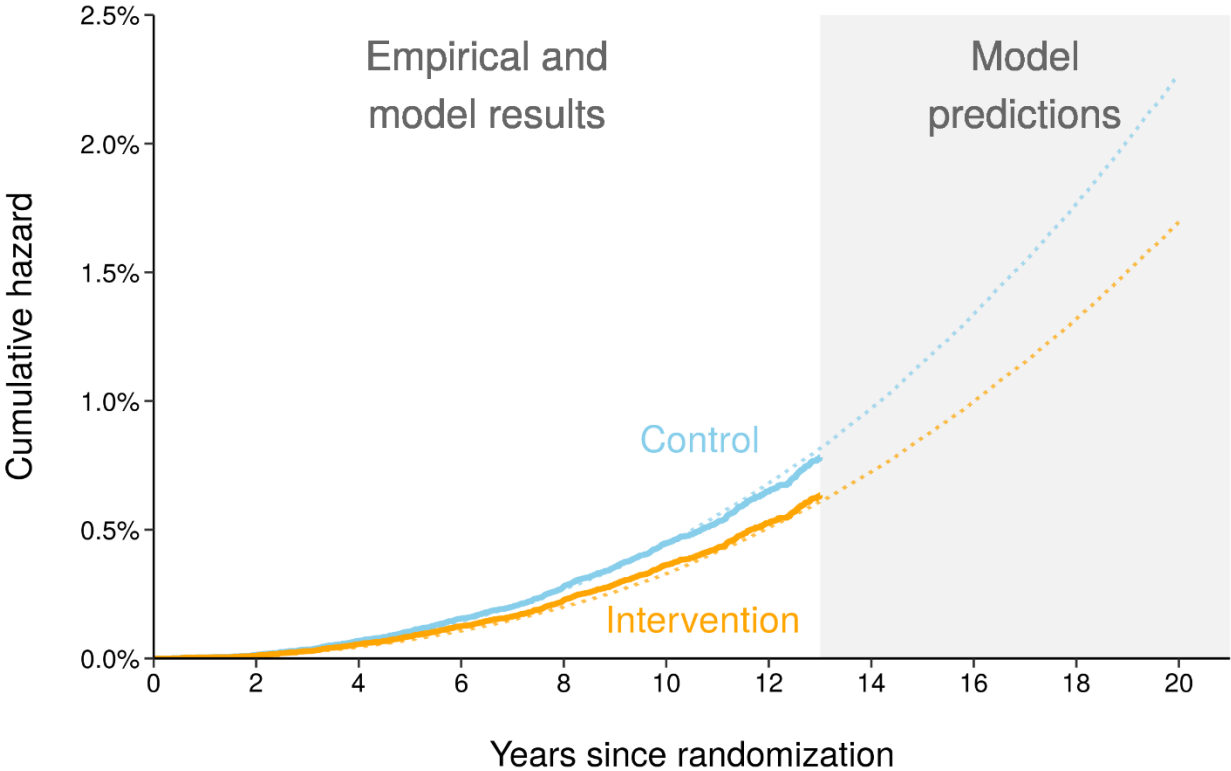

**Supplementary Figure 1. 13-year cumulative incidence of prostate cancer death for men ages 55-69 years at randomization in the European Randomized Study of Screening for Prostate Cancer. 20-year predictions from the microsimulation model are also shown.**

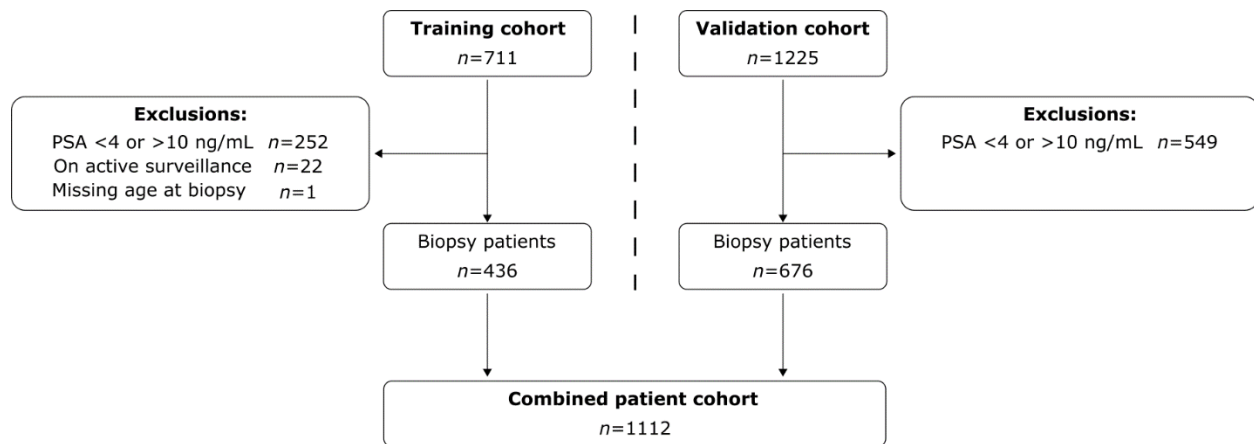

**Supplementary Figure 2. Flow diagram of patients with evaluable biopsies.** Patients from original training and validation cohorts were combined after indicated exclusions and used to generate urinary reflex biomarker levels in the microsimulation model. PSA=prostate-specific antigen

**(A) Any PCa**

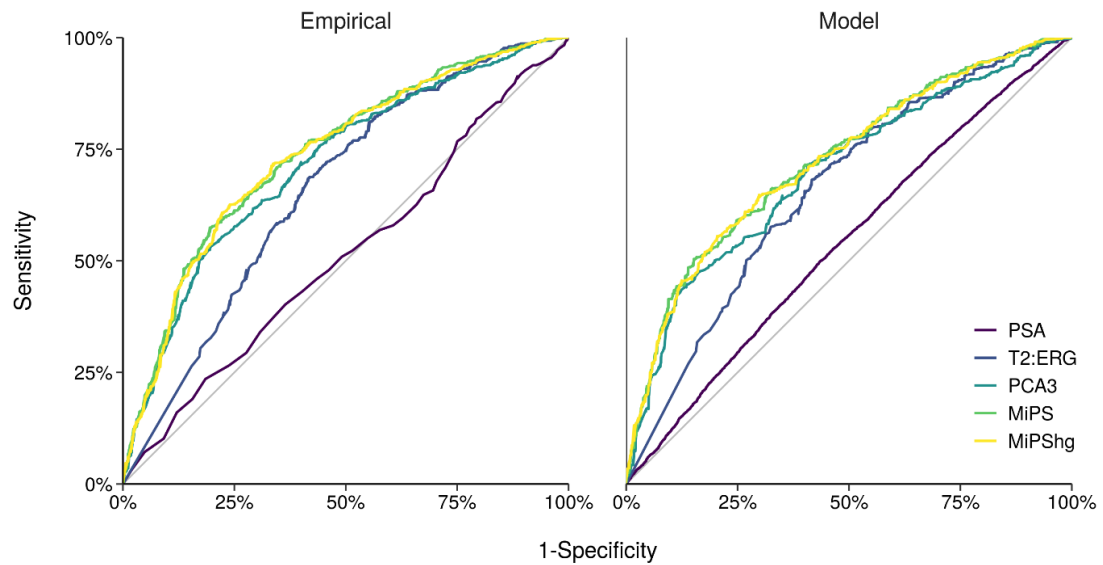

**(B) High-grade PCa**

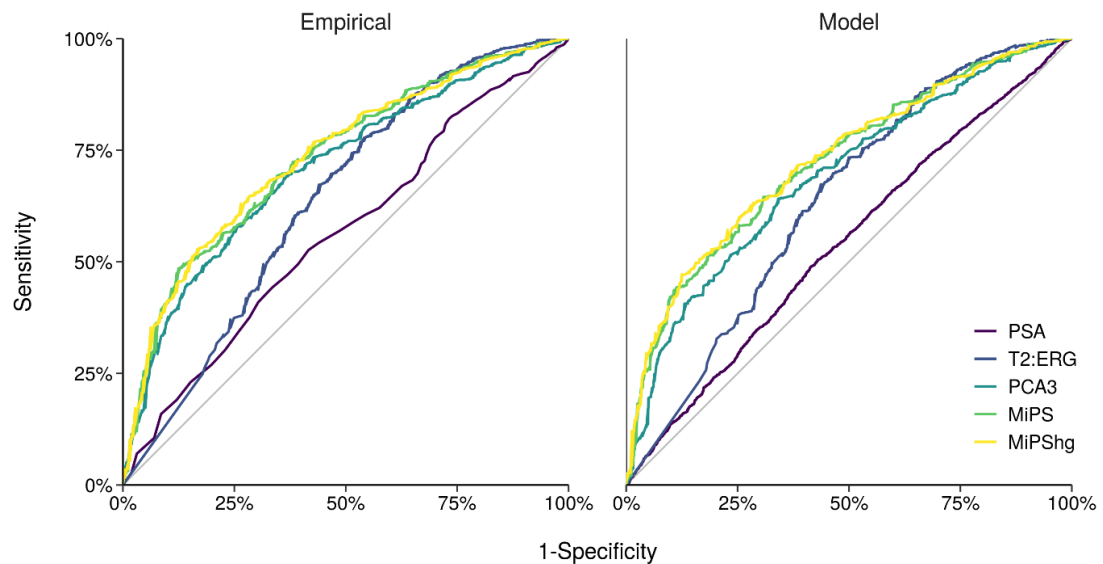

**Supplementary Figure 3. Discrimination of empirical and modeled urinary reflex biomarkers in men with prostate-specific antigen (PSA) between 4.0 and 10.0 ng/mL.** Receiver operating characteristic curves for detecting any PCa (A) and high-grade PCa (B) are shown for each biomarker.

T2:ERG=TMPRSS2:ERG gene fusion; PCA3=prostate cancer antigen 3; MiPS=Michigan Prostate Score for any PCa; MiPSHg=Michigan Prostate Score for high-grade PCa

**(A) Any PCa**

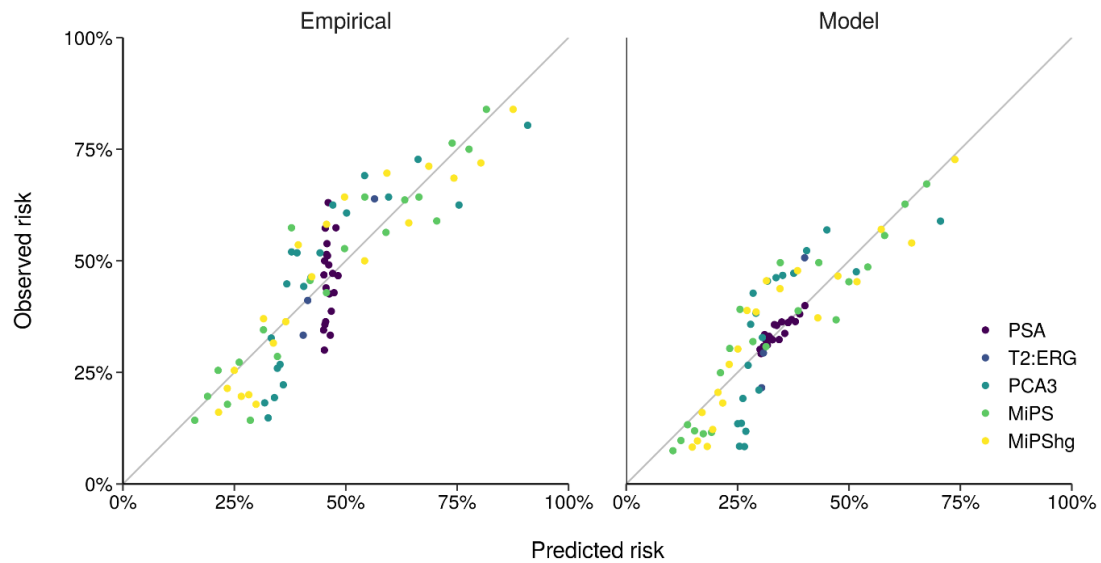

**(B) High-grade PCa**

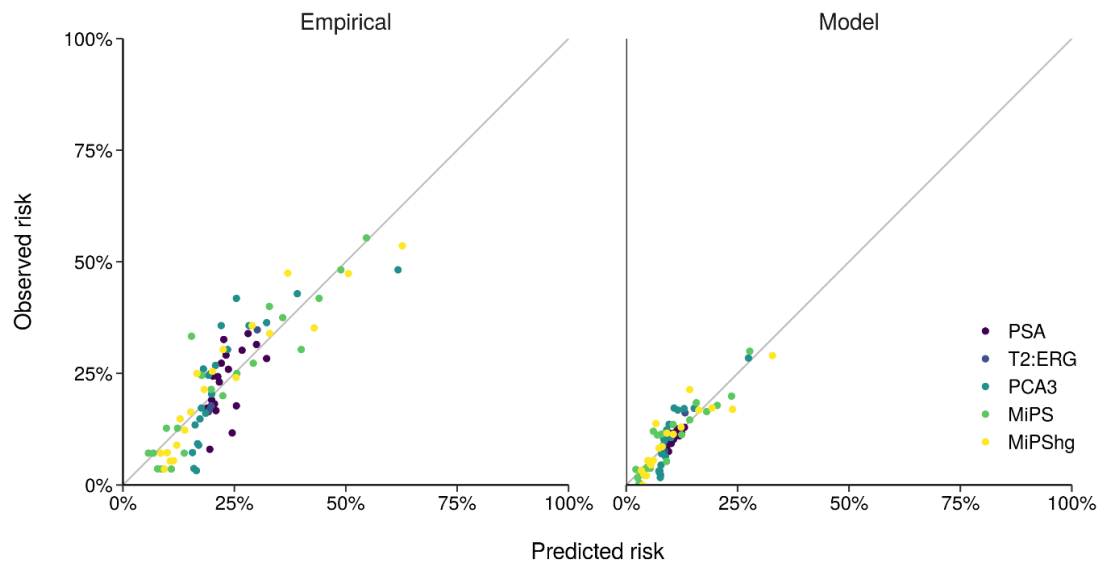

**Supplementary Figure 4. Calibration of empirical and modeled urinary reflex biomarkers in men with prostate-specific antigen (PSA) between 4.0 and 10.0 ng/mL. Calibration plots for detecting any PCa (A) and high-grade PCa (B) are shown for each biomarker.**

T2:ERG=TMPRSS2:ERG gene fusion; PCA3=prostate cancer antigen 3; MiPS=Michigan Prostate Score for any PCa; MiPShg=Michigan Prostate Score for high-grade PCa

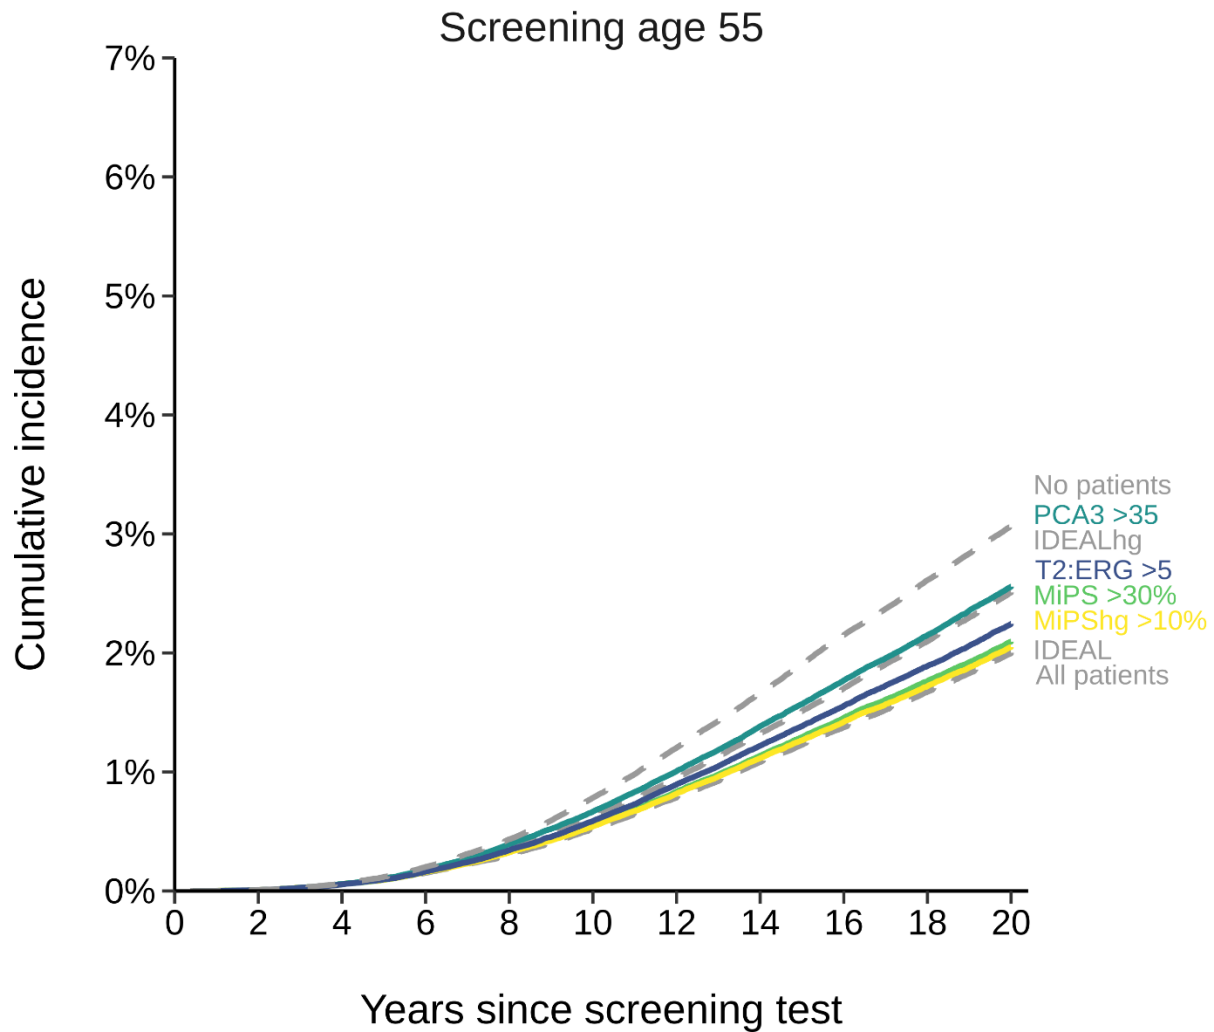

**Supplementary Figure 5. Predicted 20-year cumulative incidence of prostate cancer (PCa) death for men with prostate-specific antigen (PSA) between 4.0 and 10.0 ng/mL at screening age 55 with possible continued biennial screening up to age 69 by biopsy strategy.**

T2:ERG=TMPRSS2:ERG gene fusion; PCA3=prostate cancer antigen 3; MiPS=Michigan Prostate Score for any PCa; MiPShg=Michigan Prostate Score for high-grade PCa; IDEAL=ideal biomarker with 100% sensitivity/specificity for any PCa; IDEALhg=ideal biomarker with 100% sensitivity/specificity for high-grade PCa.
